# Supplementary material for: Bandgap tunable colloidal Cu-based ternary and quaternary chalcogenide nanosheets via partial cation exchange
Source: Royal Society of Chemistry journal article supplement (doi:10.1039/c5nr08666c), 2015-12-23
Supplement: c5nr08666c1.pdf [file c5nr08666c1.pdf]

*Supporting Information*

**Bandgap tunable colloidal Cu-based ternary and quaternary chalcogenide nanosheets *via* partial cation exchange**

Parthiban Ramasamy,<sup>a</sup> Miri Kim,<sup>b</sup> Hyun-Soo Ra,<sup>a</sup> Jinkwon Kim<sup>\*,b</sup> and Jong-Soo Lee<sup>\*,a</sup>

<sup>a</sup>Department of Energy Systems Engineering, DGIST, Daegu, 711-873, Republic of Korea.

<sup>b</sup>Department of chemistry and GETRC, Kongju National University, 182 shinkwon, Kongju, Chungnam, 314-701, Republic of Korea.

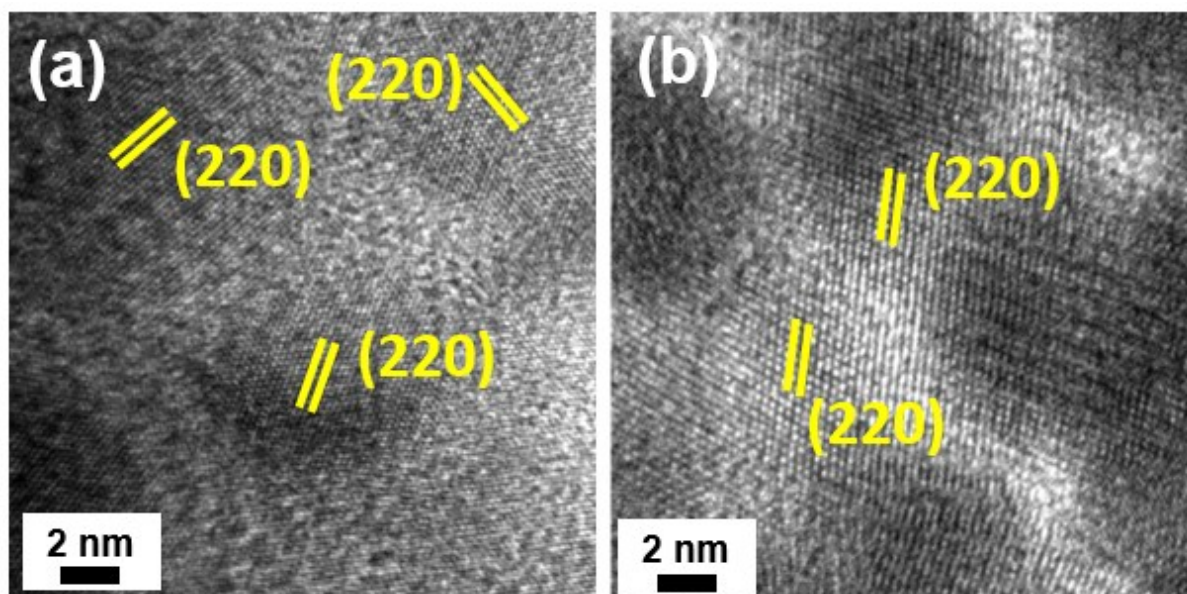

**Fig. S1** HRTEM images of  $\text{Cu}_{2-x}\text{Se}$  NSs synthesized at 150 °C for 2h.

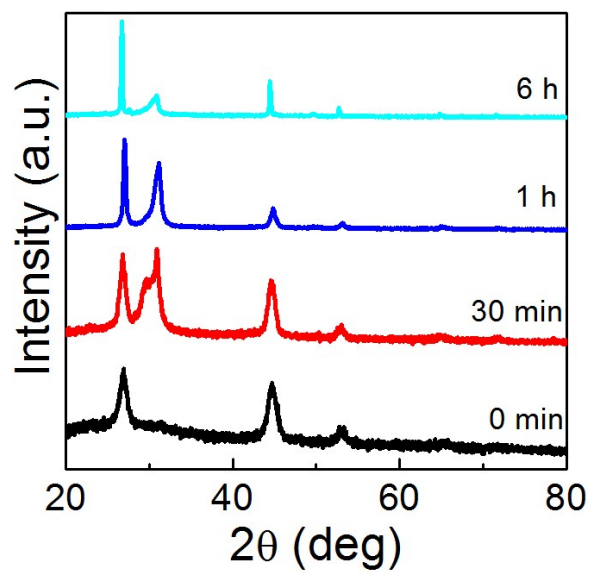

**Fig. S2** XRD patterns of  $\text{Cu}_{2-x}\text{Se}$  nanostructures synthesized at different reaction times at 150 °C.

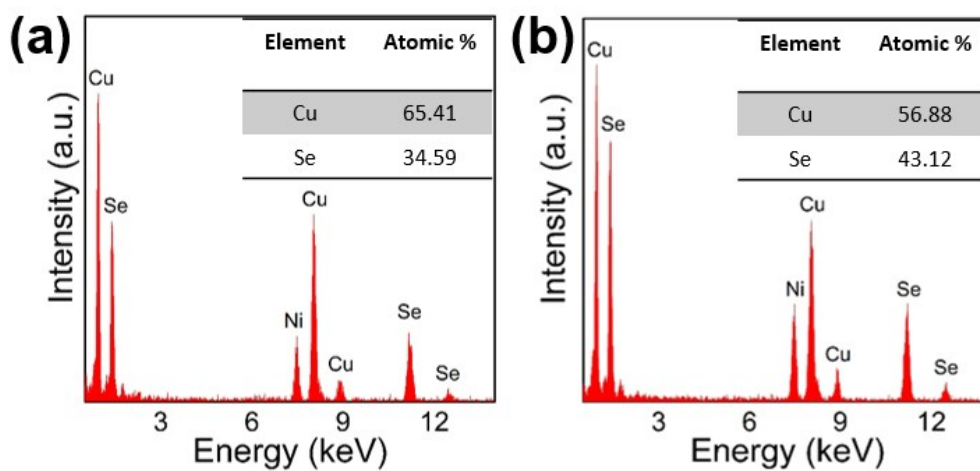

**Fig. S3** EDS spectra of  $\text{Cu}_{2-x}\text{Se}$  NSs synthesized at (a) 0 and (b) 30 min.

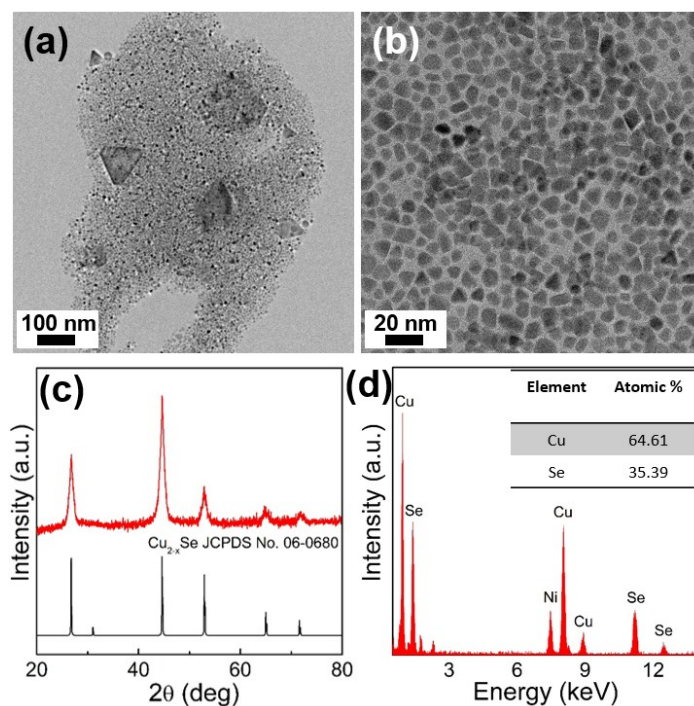

**Fig. S4** (a, b) TEM images (c) XRD pattern and (d) EDS spectrum of  $\text{Cu}_{2-x}\text{Se}$  nanoparticles synthesized at  $150\text{ }^\circ\text{C}$  for 2h using Se precursor prepared under inert condition.

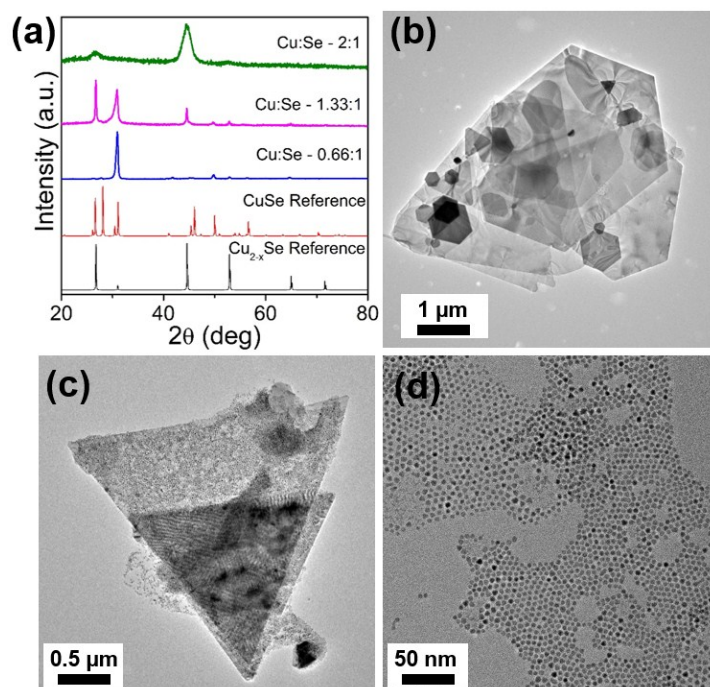

**Fig. S5** (a) XRD patterns and (b-d) TEM images of copper selenide nanostructures synthesized at  $150\text{ }^\circ\text{C}$  for 2 h with different molar ratios of  $\text{Cu}^+$  to Se powder. (b) 0.66:1, (c) 1.33:1 and (d) 2:1.

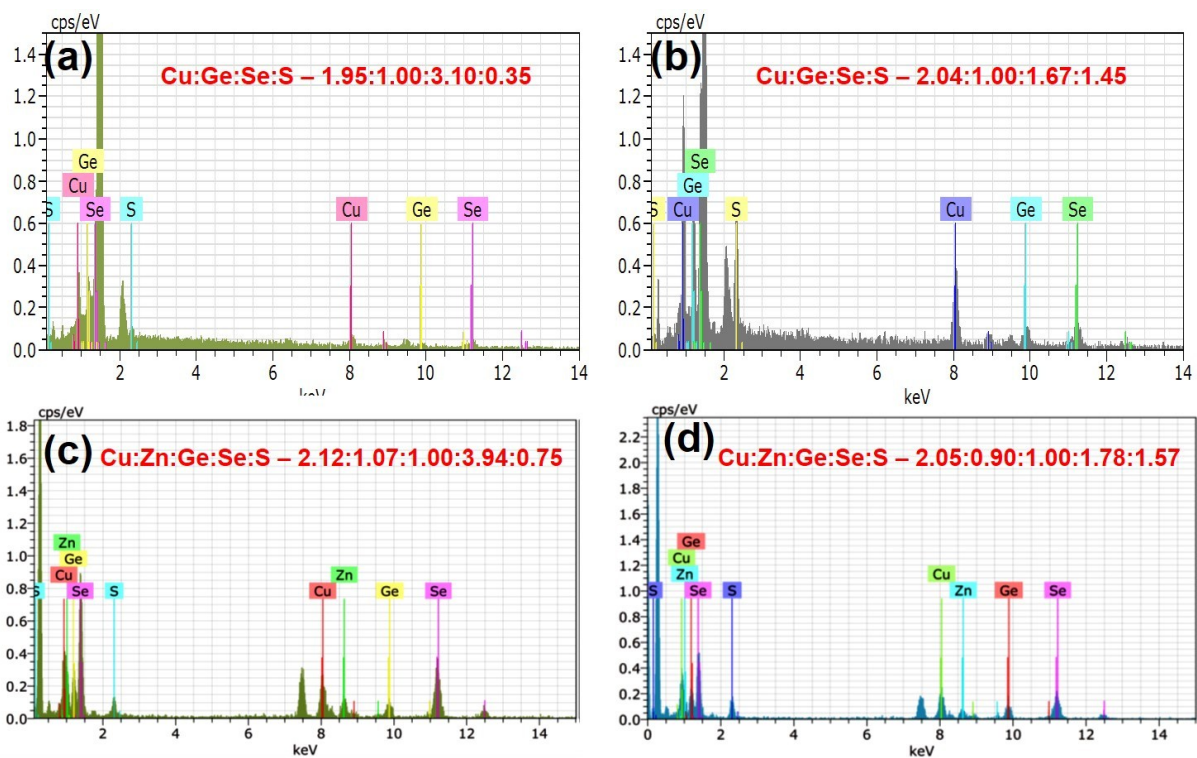

**Fig. S6** EDS spectra of (a) CGSe, (b) CGSSe, (c) CZGSe and (d) CZGSSe nanosheets.

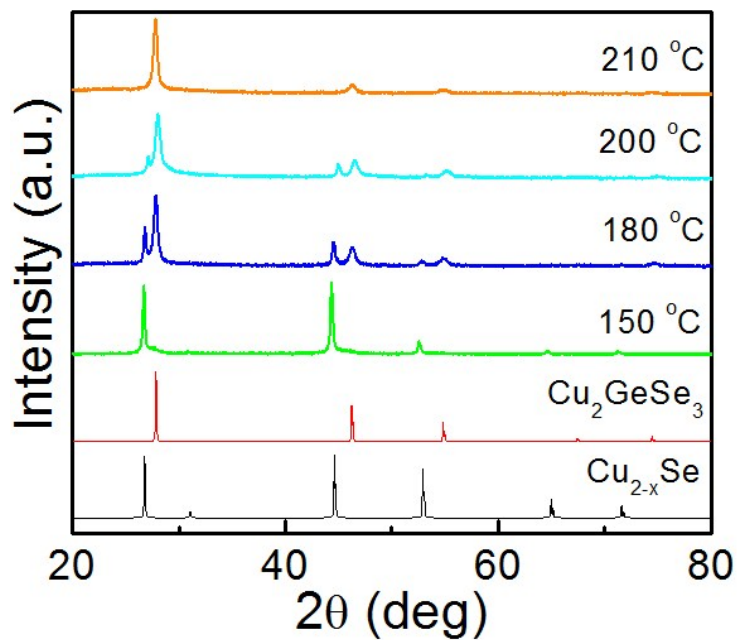

**Fig. S7** XRD patterns of CGSe nanosheets obtained at different cation exchange reaction temperatures.

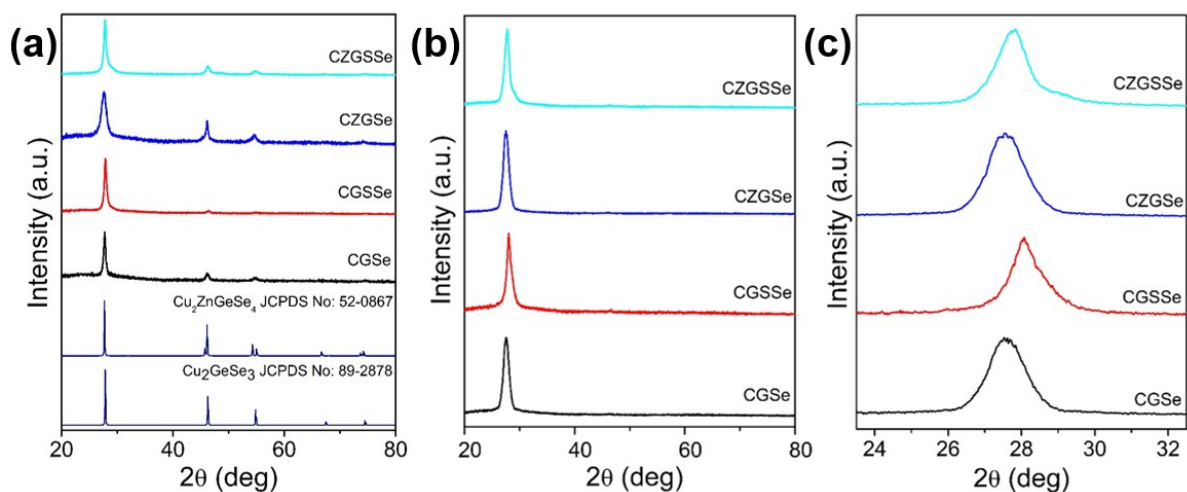

**Fig. S8** XRD patterns of CGSe, CGSSe, CZGSe and CZGSSe nanosheets. (a) thick films, and (b) drop casted thin film. (c) shows the (111) peak position to highlight the peak shifting when sulfur added to the nanosheets.

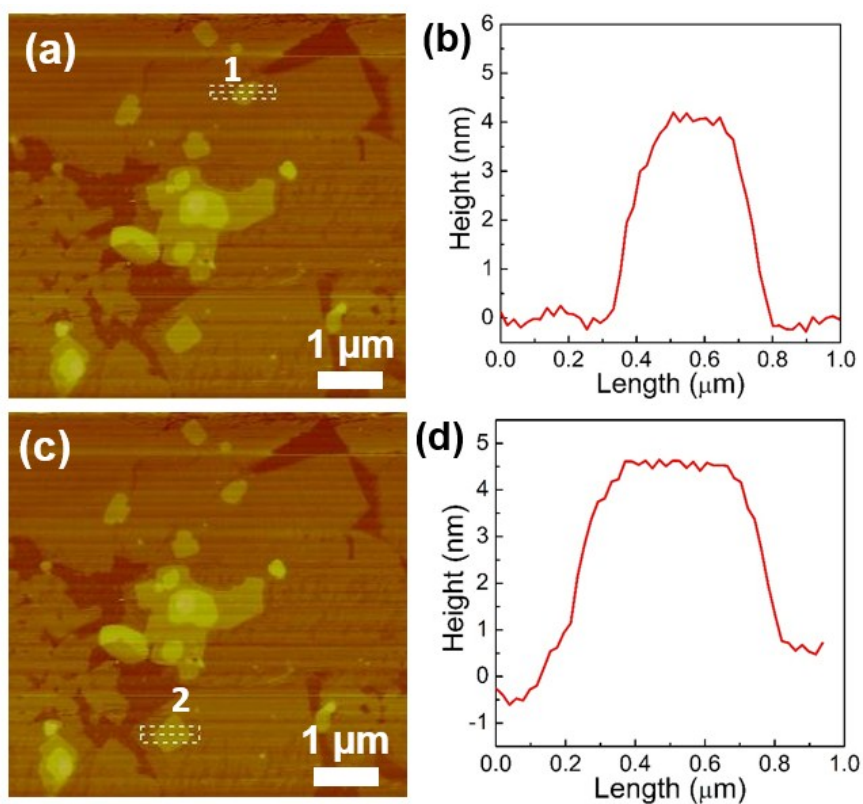

**Fig. S9** AFM image and height profiles of CGSe nanosheets measured at two different places.

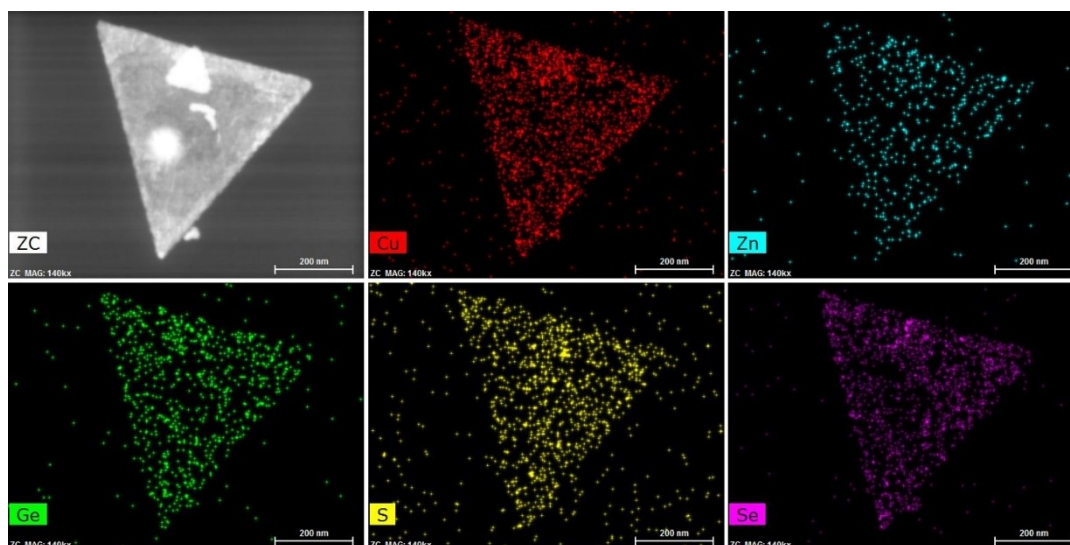

**Fig. S10** STEM-EDS elemental mappings of CZGSSe nanosheets.

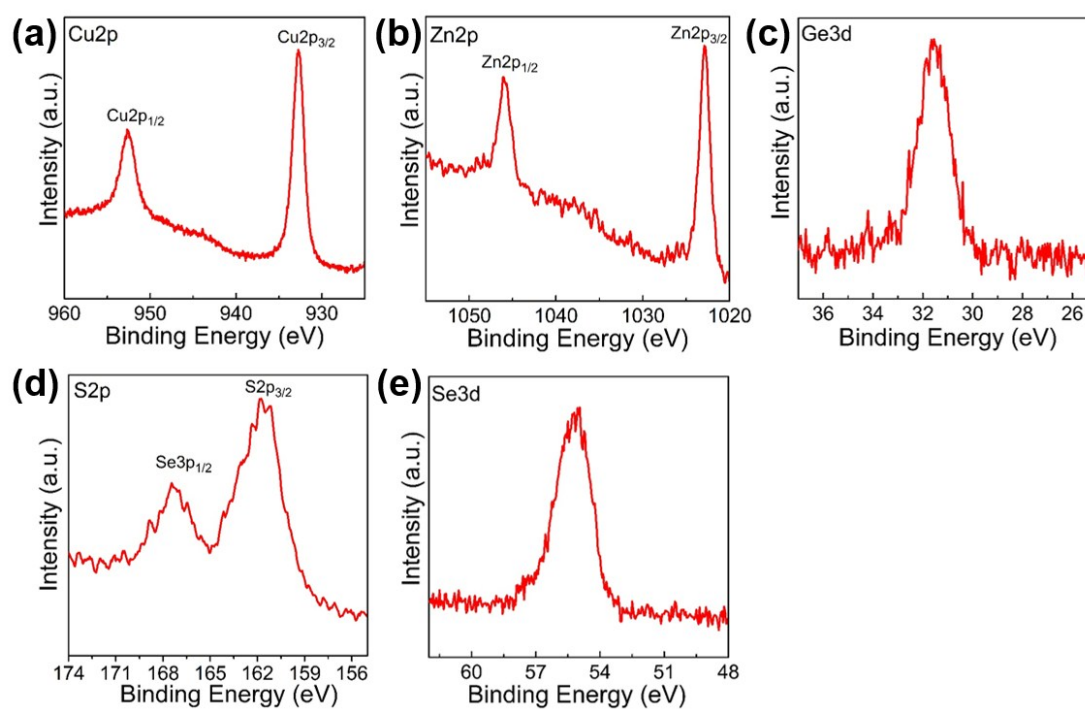

**Fig. S11** XPS spectra of CZGSSe nanosheets.

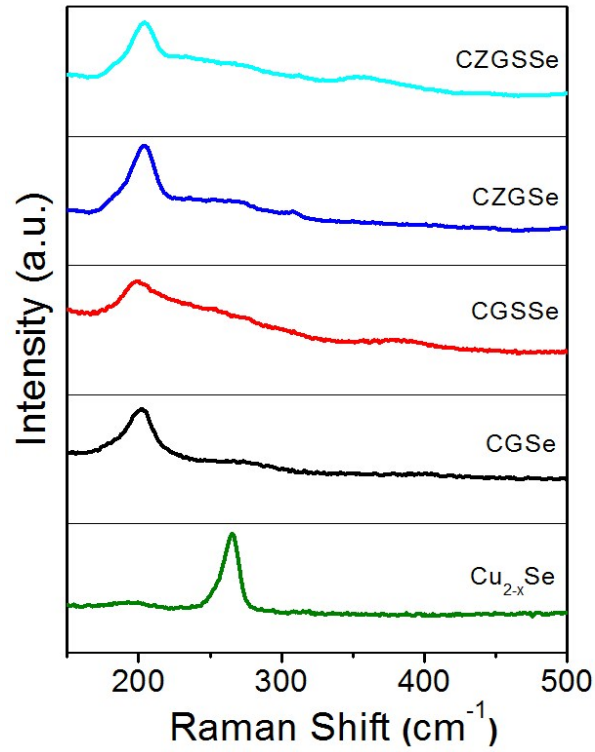

**Fig. S12** Raman spectra of  $\text{Cu}_{2-x}\text{Se}$ , CGSe, CGSSe, CZGSe and CZGSSe nanosheets.

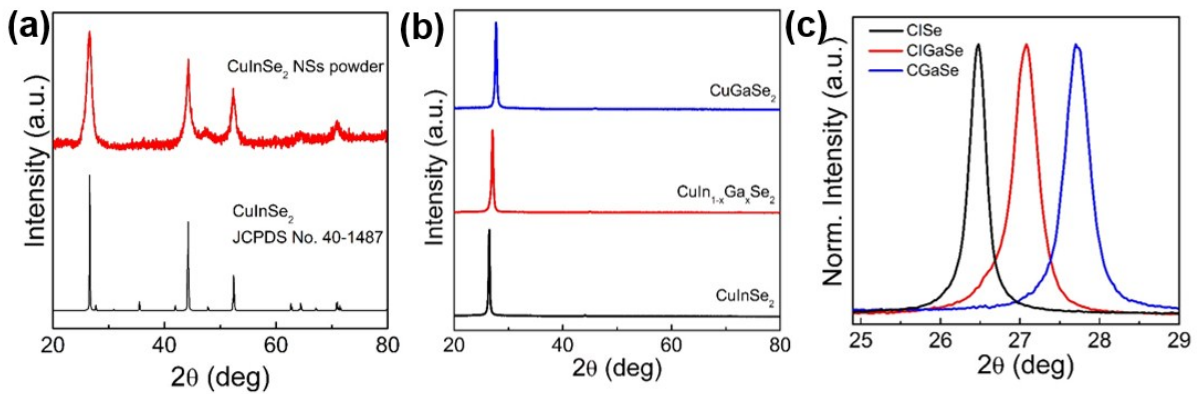

**Fig. 13** XRD patterns of  $\text{CuInSe}_2$  powder sample. XRD patterns of  $\text{CuInSe}_2$ ,  $\text{CuIn}_{1-x}\text{Ga}_x\text{Se}_2$  and  $\text{CuGaSe}_2$  nanosheets thin films. (c) shows the (111) peak position to highlight the peak shifting with increasing Ga concentration.
